# Supplementary material for: Approach to the Chemotaxonomic Characterization of Traditional Cultivation Grape Varieties through Their Varietal Aroma Profile
Source: MDPI journal article supplement (doi:10.3390/foods11101427), 2022-05-15
Supplement: s1 [file s1]

Table S1: Yearly (2015, 2016 and 2017) bioclimatic indices and climatic data in the experimental plot site in north-west Spain (EVEGA, Ourense).

| Index                    | 2015     |                     | 2016     |                         | 2017     |                         |
|--------------------------|----------|---------------------|----------|-------------------------|----------|-------------------------|
|                          | Value    | Viticulture climate | Value    | Viticulture climate     | Value    | Viticulture climate     |
| HI:                      |          |                     |          |                         |          |                         |
| Heliothermal             | 2664.15  | Warm (HI+2)         | 2522.11  | Warm (HI+2)             | 2678.62  | Warm (HI+2)             |
| CI: Night cold (°C)      | 12.24    | Cool nights (CI+1)  | 11.74    | Very cool nights (CI+2) | 11.13    | Very cool nights (CI+2) |
| Parameter                | Seasonal | Annual              | Seasonal | Annual                  | Seasonal | Annual                  |
| Max T <sup>a</sup> (°C)  | 29.31    | 23.32               | 28.85    | 22.81                   | 29.81    | 23.87                   |
| Mean T <sup>a</sup> (°C) | 18.92    | 14.26               | 18.39    | 13.92                   | 19.05    | 14.03                   |
| Min T <sup>a</sup> (°C)  | 10.30    | 7.23                | 9.97     | 7.23                    | 10.35    | 6.81                    |
| Rainfall (mm)            | 231.20   | 659.20              | 382.40   | 1211.80                 | 228.60   | 869.00                  |
| Days with mean T > 35 °C | 29       | 29                  | 46       | 46                      | 28       | 29                      |

Table S2: White varieties free aromatic fraction profile (Values are expressed as percentages).

| Varitey      | Year | % ACIDS                | % ALCOHOLS             | %ALDEHYDES             | %C6                     | %ESTERS              | %PHENOLS                | %THIOLS               |
|--------------|------|------------------------|------------------------|------------------------|-------------------------|----------------------|-------------------------|-----------------------|
| AL           | 2015 | 22.48                  | 16.64                  | 1.01                   | 40.11                   | n.d.                 | 0.22                    | n.d.                  |
|              | 2016 | 9.81                   | 25.55                  | 2.52                   | 45.79                   | n.d.                 | 0.24                    | 0.29                  |
|              | 2017 | 1.33                   | 20.56                  | 0.87                   | 52.73                   | n.d.                 | n.d.                    | n.d.                  |
|              |      | <b>11.21 ± 10.65 a</b> | <b>20.92 ± 4.46 a</b>  | <b>1.47 ± 0.91 a</b>   | <b>46.21 ± 6.32 ab</b>  | <b>n.d. a</b>        | <b>0.15 ± 0.13 a</b>    | <b>0.10 ± 0.17 ab</b> |
| BB           | 2015 | 4.51                   | 33.69                  | 8.22                   | 40.90                   | n.d.                 | n.d.                    | 0.16                  |
|              | 2016 | 3.15                   | 16.72                  | 0.37                   | 74.12                   | 0.32                 | 0.21                    | n.d.                  |
|              |      | <b>3.83 ± 0.96 a</b>   | <b>25.20 ± 12.00 a</b> | <b>4.29 ± 5.55 ab</b>  | <b>57.51 ± 23.48 ab</b> | <b>0.16 ± 0.22 a</b> | <b>0.11 ± 0.15 a</b>    | <b>0.08 ± 0.12 ab</b> |
| CBL          | 2015 | 15.52                  | 17.31                  | 3.48                   | 44.37                   | n.d.                 | 0.63                    | n.d.                  |
|              | 2016 | 11.07                  | 39.78                  | 1.34                   | 23.73                   | 10.08                | 0.25                    | n.d.                  |
|              | 2017 | 13.45                  | 21.14                  | 1.16                   | 53.29                   | n.d.                 | 2.11                    | n.d.                  |
|              |      | <b>13.35 ± 2.23 a</b>  | <b>26.08 ± 12.02 a</b> | <b>1.99 ± 1.29 ab</b>  | <b>40.46 ± 15.16 ab</b> | <b>3.36 ± 5.82 a</b> | <b>1.00 ± 0.98 a</b>    | <b>n.d. ab</b>        |
| LO           | 2015 | 11.89                  | 29.25                  | 1.30                   | 37.08                   | 8.00                 | n.d.                    | n.d.                  |
|              | 2016 | 6.17                   | 12.78                  | 0.45                   | 48.72                   | n.d.                 | n.d.                    | n.d.                  |
|              | 2017 | 2.28                   | 9.72                   | 0.42                   | 37.08                   | n.d.                 | 0.48                    | n.d.                  |
|              |      | <b>6.78 ± 4.83 a</b>   | <b>17.25 ± 10.50 a</b> | <b>0.72 ± 0.50 a</b>   | <b>40.96 ± 6.72 ab</b>  | <b>2.67 ± 4.62 a</b> | <b>0.16 ± 0.28 a</b>    | <b>n.d. ab</b>        |
| VB           | 2015 | 23.61                  | 21.09                  | 2.70                   | 48.05                   | n.d.                 | 0.42                    | n.d.                  |
|              | 2016 | 14.88                  | 15.20                  | 1.21                   | 55.61                   | 0.32                 | 0.18                    | n.d.                  |
|              | 2017 | 15.14                  | 14.59                  | 0.99                   | 41.55                   | n.d.                 | n.d.                    | n.d.                  |
|              |      | <b>17.88 ± 4.96 a</b>  | <b>16.96 ± 3.59 a</b>  | <b>1.63 ± 0.93 a</b>   | <b>48.40 ± 7.03 ab</b>  | <b>0.11 ± 0.19 a</b> | <b>0.20 ± 0.21 a</b>    | <b>n.d. a</b>         |
| Significance |      | ns                     | ns                     | ns                     | ns                      | ns                   | ns                      | ns                    |
| Varitey      | Year | %KETONES               | %PAH's                 | %LACTONS               | %NORISOPRENOIDS         | %SESQUITERPENES      | %TERPENES               |                       |
| AL           | 2015 | 2.32                   | 1.27                   | n.d.                   | 1.42                    | n.d.                 | 14.53                   |                       |
|              | 2016 | 4.60                   | 3.50                   | 1.17                   | n.d.                    | n.d.                 | 6.53                    |                       |
|              | 2017 | 2.67                   | 2.99                   | n.d.                   | n.d.                    | n.d.                 | 18.85                   |                       |
|              |      | <b>3.20 ± 1.23 abc</b> | <b>2.58 ± 1.17 ab</b>  | <b>0.39 ± 0.67 ab</b>  | <b>0.47 ± 0.82 a</b>    | <b>n.d. a</b>        | <b>13.31 ± 6.25 b</b>   |                       |
| BB           | 2015 | 1.95                   | 4.09                   | 0.98                   | n.d.                    | n.d.                 | 5.51                    |                       |
|              | 2016 | 1.14                   | 1.03                   | 0.58                   | 0.42                    | n.d.                 | 1.95                    |                       |
|              |      | <b>1.54 ± 0.57 ab</b>  | <b>2.56 ± 2.16 ab</b>  | <b>0.78 ± 0.28 abc</b> | <b>0.21 ± 0.30 a</b>    | <b>n.d. a</b>        | <b>3.73 ± 2.52 ab</b>   |                       |
| CBL          | 2015 | 7.76                   | 4.90                   | 1.63                   | 2.33                    | n.d.                 | 2.07                    |                       |
|              | 2016 | 4.50                   | 5.04                   | 2.41                   | 0.32                    | n.d.                 | 1.49                    |                       |
|              | 2017 | 2.62                   | 1.15                   | 1.42                   | 1.69                    | n.d.                 | 1.98                    |                       |
|              |      | <b>4.96 ± 2.60 c</b>   | <b>3.70 ± 2.21 b</b>   | <b>1.82 ± 0.52 c</b>   | <b>1.45 ± 1.03 b</b>    | <b>n.d. a</b>        | <b>1.84 ± 0.31 ab</b>   |                       |
| LO           | 2015 | 0.51                   | 0.55                   | 0.06                   | 0.50                    | n.d.                 | 10.86                   |                       |
|              | 2016 | 3.60                   | 2.68                   | 2.34                   | n.d.                    | n.d.                 | 23.26                   |                       |
|              | 2017 | 1.15                   | 1.17                   | 0.51                   | 0.15                    | n.d.                 | 47.05                   |                       |
|              |      | <b>1.75 ± 1.63 ab</b>  | <b>1.47 ± 1.09 a</b>   | <b>0.97 ± 1.21 abc</b> | <b>0.21 ± 0.26 a</b>    | <b>n.d. a</b>        | <b>27.06 ± 18.39 c</b>  |                       |
| VB           | 2015 | 0.88                   | 0.45                   | n.d.                   | 0.03                    | n.d.                 | 2.77                    |                       |
|              | 2016 | 0.80                   | 1.78                   | 0.09                   | 0.24                    | n.d.                 | 9.68                    |                       |
|              | 2017 | 2.64                   | 1.65                   | n.d.                   | 0.93                    | n.d.                 | 22.52                   |                       |
|              |      | <b>1.44 ± 1.04 a</b>   | <b>1.29 ± 0.73 a</b>   | <b>0.03 ± 0.05 a</b>   | <b>0.40 ± 0.47 a</b>    | <b>n.d. a</b>        | <b>11.66 ± 10.02 ab</b> |                       |
| Significance |      | ns                     | ns                     | ns                     | ns                      | ns                   | **                      |                       |

PAH's: Polycyclic Aromatic Hidrocarbons; AL: 'Albariño'; BB: 'Brancellao Blanco'; CBL: 'Caíño Blanco'; LO: 'Loureira'; VB: 'Verdello Blanco'; n.d.: no detected. \*\* and ns indicate significance at P≤0.01 and not

significant difference respectively. Mean value, SD and different roman letters (a-c), showing significant differences according to Fisher's test ( $P < 0.05$ ), are indicated in bold for each variety.

Table S3: Red varieties free aromatic fraction profile (Values are expressed as percentages).

| Varitey      | Year | % ACIDS                | % ALCOHOLS            | %ALDEHYDES             | %C6                     | %ESTERS              | %PHENOLS              | %THIOLS               |
|--------------|------|------------------------|-----------------------|------------------------|-------------------------|----------------------|-----------------------|-----------------------|
| BR           | 2015 | 15.06                  | 13.74                 | 9.51                   | 58.81                   | 0.21                 | n.d.                  | n.d.                  |
|              | 2016 | 3.56                   | 14.43                 | 3.60                   | 72.88                   | 0.29                 | n.d.                  | n.d.                  |
|              | 2017 | 6.32                   | 16.49                 | 1.90                   | 61.61                   | n.d.                 | 1.96                  | n.d.                  |
|              |      | <b>8.31 ± 6.00 a</b>   | <b>14.89 ± 1.43 a</b> | <b>5.01 ± 3.99 b</b>   | <b>64.44 ± 7.45 b</b>   | <b>0.17 ± 0.15 a</b> | <b>0.65 ± 1.13 a</b>  | <b>n.d. a</b>         |
| CB           | 2015 | 25.14                  | 22.16                 | 1.92                   | 40.62                   | n.d.                 | 0.43                  | n.d.                  |
|              | 2016 | 12.70                  | 21.18                 | 0.39                   | 54.99                   | 0.25                 | 0.31                  | n.d.                  |
|              | 2017 | 10.09                  | 28.56                 | 2.39                   | 48.77                   | n.d.                 | 0.27                  | n.d.                  |
|              |      | <b>15.98 ± 8.04 a</b>  | <b>23.97 ± 4.01 a</b> | <b>1.57 ± 1.05 a</b>   | <b>48.13 ± 7.20 ab</b>  | <b>0.08 ± 0.14 a</b> | <b>0.34 ± 0.08 a</b>  | <b>n.d. a</b>         |
| CL1          | 2015 | 29.91                  | 17.93                 | 0.51                   | 40.36                   | n.d.                 | 0.31                  | n.d.                  |
|              | 2016 | 0.00                   | 7.98                  | 1.75                   | 85.87                   | 0.19                 | 0.05                  | n.d.                  |
|              | 2017 | 11.94                  | 24.03                 | 0.00                   | 52.04                   | 0.14                 | 0.53                  | n.d.                  |
|              |      | <b>13.95 ± 15.06 a</b> | <b>16.65 ± 8.10 a</b> | <b>0.75 ± 0.90 a</b>   | <b>59.42 ± 23.64 ab</b> | <b>0.11 ± 0.10 a</b> | <b>0.30 ± 0.24 a</b>  | <b>n.d. a</b>         |
| CL2          | 2015 | 15.41                  | 16.83                 | 0.62                   | 40.01                   | n.d.                 | 0.37                  | n.d.                  |
|              | 2016 | 3.56                   | 13.13                 | 0.93                   | 76.76                   | 0.36                 | 0.13                  | n.d.                  |
|              | 2017 | 3.15                   | 19.66                 | 0.51                   | 64.29                   | n.d.                 | 0.93                  | n.d.                  |
|              |      | <b>7.37 ± 6.96 a</b>   | <b>16.54 ± 3.27 a</b> | <b>0.69 ± 0.22 a</b>   | <b>60.36 ± 18.69 ab</b> | <b>0.12 ± 0.21 a</b> | <b>0.48 ± 0.41 a</b>  | <b>n.d. a</b>         |
| CT           | 2015 | 20.13                  | 19.97                 | 2.93                   | 43.99                   | n.d.                 | 0.39                  | n.d.                  |
|              | 2016 | 3.14                   | 11.22                 | 3.96                   | 78.11                   | 0.16                 | n.d.                  | n.d.                  |
|              | 2017 | 9.69                   | 16.43                 | 0.00                   | 64.70                   | n.d.                 | 0.90                  | n.d.                  |
|              |      | <b>10.99 ± 8.57 a</b>  | <b>15.87 ± 4.40 a</b> | <b>2.30 ± 2.06 ab</b>  | <b>62.26 ± 17.19 ab</b> | <b>0.05 ± 0.09 a</b> | <b>0.43 ± 0.45 a</b>  | <b>n.d. a</b>         |
| CS           | 2015 | 19.45                  | 13.04                 | 0.94                   | 51.17                   | n.d.                 | 0.46                  | 1.87                  |
|              | 2016 | 11.45                  | 17.17                 | 0.67                   | 62.04                   | n.d.                 | 0.49                  | n.d.                  |
|              | 2017 | 8.29                   | 19.43                 | 1.29                   | 60.61                   | 0.17                 | 1.74                  | n.d.                  |
|              |      | <b>13.06 ± 5.75 a</b>  | <b>16.55 ± 3.24 a</b> | <b>0.97 ± 0.31 a</b>   | <b>57.94 ± 5.91 ab</b>  | <b>0.06 ± 0.10 a</b> | <b>0.89 ± 0.73 a</b>  | <b>0.62 ± 1.08 b</b>  |
| SO           | 2016 | 4.42                   | 16.29                 | 1.20                   | 72.55                   | 0.97                 | n.d.                  | 0.13                  |
|              | 2017 | 14.45                  | 27.79                 | 1.06                   | 47.89                   | n.d.                 | 0.27                  | n.d.                  |
|              |      | <b>9.43 ± 7.09 a</b>   | <b>22.04 ± 8.13 a</b> | <b>1.13 ± 0.10 a</b>   | <b>60.22 ± 17.44 ab</b> | <b>0.49 ± 0.69 a</b> | <b>0.13 ± 0.19 a</b>  | <b>0.07 ± 0.09 ab</b> |
| Significance |      | ns                     | ns                    | ns                     | ns                      | ns                   | ns                    | ns                    |
| Varitey      | Year | %KETONES               | %PAH's                | %LACTONS               | %NORISOPRENOIDS         | %SESQUITERPENES      | %TERPENES             |                       |
| BR           | 2015 | 0.88                   | 0.28                  | 0.24                   | n.d.                    | n.d.                 | 1.26                  |                       |
|              | 2016 | 2.05                   | 1.73                  | 1.19                   | n.d.                    | n.d.                 | 0.26                  |                       |
|              | 2017 | 3.03                   | 1.68                  | n.d.                   | n.d.                    | n.d.                 | 7.00                  |                       |
|              |      | <b>1.99 ± 1.08 abc</b> | <b>1.23 ± 0.82 a</b>  | <b>0.48 ± 0.63 abc</b> | <b>n.d. a</b>           | <b>n.d. a</b>        | <b>2.84 ± 3.64 ab</b> |                       |
| CB           | 2015 | 4.44                   | 2.27                  | 1.28                   | 0.46                    | n.d.                 | 1.27                  |                       |
|              | 2016 | 4.70                   | 3.38                  | 1.69                   | n.d.                    | n.d.                 | 0.40                  |                       |
|              | 2017 | 4.87                   | 3.23                  | 0.27                   | 0.10                    | n.d.                 | 1.43                  |                       |
|              |      | <b>4.67 ± 0.22 bc</b>  | <b>2.96 ± 0.61 ab</b> | <b>1.08 ± 0.73 abc</b> | <b>0.19 ± 0.24 a</b>    | <b>n.d. a</b>        | <b>1.04 ± 0.56 ab</b> |                       |
| CL1          | 2015 | 5.10                   | 2.16                  | 1.61                   | 0.72                    | n.d.                 | 1.40                  |                       |
|              | 2016 | 1.75                   | 0.85                  | 1.32                   | n.d.                    | n.d.                 | 0.24                  |                       |
|              | 2017 | 4.51                   | 2.03                  | 0.19                   | 0.59                    | n.d.                 | 3.99                  |                       |
|              |      | <b>3.79 ± 1.79 abc</b> | <b>1.68 ± 0.72 ab</b> | <b>1.04 ± 0.75 abc</b> | <b>0.44 ± 0.38 a</b>    | <b>n.d. a</b>        | <b>1.88 ± 1.92 ab</b> |                       |
| CL2          | 2015 | 5.64                   | 3.11                  | 0.18                   | 1.66                    | n.d.                 | 16.16                 |                       |
|              | 2016 | 2.16                   | 1.17                  | 0.45                   | n.d.                    | n.d.                 | 1.34                  |                       |
|              | 2017 | 4.31                   | 0.86                  | 3.42                   | n.d.                    | n.d.                 | 2.87                  |                       |

|              |      |                        |                       |                        |                       |                    |                       |
|--------------|------|------------------------|-----------------------|------------------------|-----------------------|--------------------|-----------------------|
|              |      | <b>4.04 ± 1.76 abc</b> | <b>1.71 ± 1.22 ab</b> | <b>1.35 ± 1.80 abc</b> | <b>0.55 ± 0.96 ab</b> | n.d. a             | <b>6.79 ± 8.15 ab</b> |
| CT           | 2015 | 7.11                   | 2.51                  | 1.45                   | 1.25                  | n.d.               | 0.27                  |
|              | 2016 | 1.04                   | 1.09                  | 1.10                   | n.d.                  | n.d.               | 0.17                  |
|              | 2017 | 3.69                   | 2.10                  | 1.15                   | 0.49                  | 0.05               | 0.79                  |
|              |      | <b>3.95 ± 3.04 abc</b> | <b>1.90 ± 0.73 ab</b> | <b>1.23 ± 0.19 abc</b> | <b>0.58 ± 0.63 ab</b> | <b>0.02 0.03 b</b> | <b>0.41 ± 0.33 a</b>  |
| CS           | 2015 | 6.15                   | 5.12                  | 1.48                   | 0.10                  | n.d.               | 0.21                  |
|              | 2016 | 4.29                   | 2.05                  | 1.60                   | n.d.                  | n.d.               | 0.24                  |
|              | 2017 | 3.68                   | 2.01                  | 2.06                   | 0.24                  | n.d.               | 0.48                  |
|              |      | <b>4.71 ± 1.29 bc</b>  | <b>3.06 ± 1.79 b</b>  | <b>1.71 ± 0.30 bc</b>  | <b>0.12 ± 0.12 a</b>  | n.d. a             | <b>0.31 ± 0.15 a</b>  |
| SO           | 2016 | 2.06                   | 1.32                  | 0.76                   | n.d.                  | n.d.               | 0.30                  |
|              | 2017 | 5.92                   | 1.30                  | 0.94                   | 0.21                  | n.d.               | 0.18                  |
|              |      | <b>3.99 ± 2.73 abc</b> | <b>1.31 ± 0.01 a</b>  | <b>0.85 ± 0.13 abc</b> | <b>0.10 ± 0.15 a</b>  | n.d. a             | <b>0.24 ± 0.09 a</b>  |
| Significance |      | ns                     | ns                    | ns                     | ns                    | ns                 | **                    |

PAH's: Polycyclic Aromatic Hydrocarbons; BR: 'Brancellao'; CB: 'Caíño Bravo'; CL1: 'Caíño Longo 1'; CL2: 'Caíño Longo 2'; CT: 'Caíño Tinto'; CS: 'Castañal'; SO: 'Sousón'. n.d.: no detected. \*\* and ns indicate significance at  $P \leq 0.01$  and not significant difference respectively. Mean value, SD and different roman letters (a-c), showing significant differences according to Fisher's test ( $P < 0.05$ ), are indicated in bold for each variety.

Table S4: White varieties aromatic precursor fraction profile (Values are expressed as percentages).

| Varitey      | Year | % ACIDS               | % ALCOHOLS                | %ALDEHYDES             | %C6                     | %ESTERS                | %PHENOLS                  | %THIOLS               |
|--------------|------|-----------------------|---------------------------|------------------------|-------------------------|------------------------|---------------------------|-----------------------|
| AL           | 2015 | 10.90                 | 35.71                     | n.d.                   | 4.83                    | 10.95                  | 4.97                      | n.d.                  |
|              | 2016 | 2.40                  | 11.46                     | n.d.                   | 1.96                    | 36.12                  | 41.98                     | n.d.                  |
|              | 2017 | 13.75                 | 26.47                     | n.d.                   | 2.72                    | 31.37                  | 2.11                      | 0.11                  |
|              |      | <b>9.02 ± 5.90 b</b>  | <b>24.55 ± 12.24 a</b>    | <b>n.d. a</b>          | <b>3.17 ± 1.49 a</b>    | <b>26.15 ± 13.37 b</b> | <b>16.36 ± 22.24 abcd</b> | <b>0.04 ± 0.07 a</b>  |
| BB           | 2015 | 0.00                  | 54.40                     | n.d.                   | 14.36                   | 1.48                   | 15.71                     | 0.48                  |
|              | 2016 | 0.98                  | 28.21                     | n.d.                   | 5.83                    | 6.76                   | 54.82                     | 0.21                  |
|              |      | <b>0.49 ± 0.69 ab</b> | <b>41.30 ± 18.51 abcd</b> | <b>n.d. a</b>          | <b>10.10 ± 6.03 abc</b> | <b>4.12 ± 3.73 a</b>   | <b>35.27 ± 27.65 cd</b>   | <b>0.35 ± 0.19 ab</b> |
| CBL          | 2015 | 10.07                 | 48.69                     | 1.66                   | 6.96                    | 15.88                  | 8.66                      | 0.22                  |
|              | 2016 | 2.92                  | 72.97                     | 2.39                   | 5.00                    | 8.93                   | 4.44                      | n.d.                  |
|              | 2017 | 0.82                  | 65.32                     | 2.78                   | 3.91                    | 12.79                  | 2.86                      | n.d.                  |
|              |      | <b>4.60 ± 4.85 ab</b> | <b>62.33 ± 12.41 d</b>    | <b>2.28 ± 0.57 abc</b> | <b>5.29 ± 1.55 ab</b>   | <b>12.53 ± 3.48 ab</b> | <b>5.32 ± 3.00 ab</b>     | <b>0.07 ± 0.13 a</b>  |
| LO           | 2015 | 2.87                  | 34.33                     | n.d.                   | 3.16                    | 5.14                   | 0.89                      | 0.24                  |
|              | 2016 | 18.39                 | 43.51                     | 2.88                   | 2.31                    | 20.36                  | 8.91                      | n.d.                  |
|              | 2017 | 0.96                  | 59.88                     | n.d.                   | 3.09                    | 3.45                   | 4.75                      | 0.10                  |
|              |      | <b>7.41 ± 9.56 ab</b> | <b>45.91 ± 12.95 abcd</b> | <b>0.96 ± 1.66 abc</b> | <b>2.85 ± 0.47 a</b>    | <b>9.65 ± 9.31 ab</b>  | <b>4.85 ± 4.01 ab</b>     | <b>0.11 ± 0.12 ab</b> |
| VB           | 2015 | 0.52                  | 35.41                     | n.d.                   | 4.26                    | 1.90                   | 22.86                     | n.d.                  |
|              | 2016 | 1.74                  | 35.51                     | n.d.                   | 9.89                    | 9.75                   | 28.65                     | n.d.                  |
|              | 2017 | 2.37                  | 30.25                     | n.d.                   | 4.07                    | 6.62                   | 32.15                     | n.d.                  |
|              |      | <b>1.55 ± 0.94 ab</b> | <b>33.72 ± 3.01 abc</b>   | <b>n.d. a</b>          | <b>6.07 ± 3.30 ab</b>   | <b>6.09 ± 3.95 a</b>   | <b>27.89 ± 4.69 bcd</b>   | <b>n.d. a</b>         |
| Significance |      | ns                    | *                         | ns                     | ***                     | ns                     | *                         | ns                    |
| Varitey      | Year | %KETONES              | %PAH's                    | %LACTONS               | %NORISOPRENOIDS         | %SESQUITERPENES        | %TERPENES                 |                       |
| AL           | 2015 | 0.43                  | 0.12                      | n.d.                   | 0.23                    | n.d.                   | 31.85                     |                       |
|              | 2016 | 0.41                  | 0.07                      | n.d.                   | n.d.                    | 0.01                   | 5.58                      |                       |
|              | 2017 | 0.48                  | 0.43                      | n.d.                   | n.d.                    | n.d.                   | 22.55                     |                       |
|              |      | <b>0.44 ± 0.04 a</b>  | <b>0.21 ± 0.19 ab</b>     | <b>n.d. a</b>          | <b>0.08 ± 0.14 a</b>    | <b>n.d. a</b>          | <b>19.99 ± 13.32 ab</b>   |                       |
| BB           | 2015 | 0.48                  | 0.23                      | n.d.                   | n.d.                    | 0.02                   | 12.83                     |                       |
|              | 2016 | 0.32                  | 0.05                      | n.d.                   | n.d.                    | 0.01                   | 2.80                      |                       |
|              |      | <b>0.40 ± 0.11 a</b>  | <b>0.14 ± 0.13 ab</b>     | <b>n.d. a</b>          | <b>n.d. a</b>           | <b>0.02 ± 0.01 ab</b>  | <b>7.82 ± 7.09 ab</b>     |                       |
| CBL          | 2015 | 0.64                  | 0.05                      | n.d.                   | n.d.                    | 0.04                   | 7.11                      |                       |
|              | 2016 | 1.26                  | 0.28                      | n.d.                   | n.d.                    | n.d.                   | 1.82                      |                       |
|              | 2017 | 0.74                  | 0.35                      | n.d.                   | 0.07                    | n.d.                   | 10.36                     |                       |
|              |      | <b>0.88 ± 0.33 a</b>  | <b>0.22 ± 0.16 ab</b>     | <b>n.d. a</b>          | <b>0.02 ± 0.04 a</b>    | <b>0.01 ± 0.02 a</b>   | <b>6.43 ± 4.31 ab</b>     |                       |
| LO           | 2015 | 0.10                  | 0.02                      | n.d.                   | n.d.                    | n.d.                   | 53.26                     |                       |
|              | 2016 | 2.32                  | 0.56                      | n.d.                   | n.d.                    | n.d.                   | 0.76                      |                       |
|              | 2017 | 0.58                  | 0.44                      | n.d.                   | 0.08                    | n.d.                   | 26.67                     |                       |
|              |      | <b>1.00 ± 1.17 a</b>  | <b>0.34 ± 0.28 ab</b>     | <b>n.d. a</b>          | <b>0.03 ± 0.05 a</b>    | <b>n.d. a</b>          | <b>26.90 ± 26.25 b</b>    |                       |
| VB           | 2015 | 0.05                  | 0.06                      | n.d.                   | n.d.                    | 0.04                   | 34.89                     |                       |
|              | 2016 | 0.32                  | 0.11                      | n.d.                   | n.d.                    | 0.03                   | 14.01                     |                       |
|              | 2017 | 0.55                  | 0.21                      | n.d.                   | n.d.                    | 0.05                   | 23.72                     |                       |
|              |      | <b>0.31 ± 0.25 a</b>  | <b>0.13 ± 0.08 ab</b>     | <b>n.d. a</b>          | <b>n.d. a</b>           | <b>0.04 ± 0.01 b</b>   | <b>24.20 ± 10.45 ab</b>   |                       |
| Significance |      | ns                    | ns                        | ns                     | ns                      | *                      | ns                        |                       |

PAH's: Polycyclic Aromatic Hidrocarbons; AL: 'Albariño'; BB: 'Brancellao Blanco'; CBL: 'Caíño Blanco'; LO: 'Loureira'; VB: 'Verdello Blanco'; n.d.: no detected. \*, \*\*\* and ns indicate significance at P≤0.05, P≤0.001

and not significant difference respectively. Mean value, SD and different roman letters (a-d), showing significant differences according to Fisher's test ( $P < 0.05$ ), are indicated in bold for each variety.

Table S5: Red varieties aromatic precursor fraction profile (Values are expressed as percentages).

| Varitey      | Year | % ACIDS               | % ALCOHOLS                | %ALDEHYDES             | %C6                    | %ESTERS                 | %PHENOLS                | %THIOLS               |
|--------------|------|-----------------------|---------------------------|------------------------|------------------------|-------------------------|-------------------------|-----------------------|
| BR           | 2016 | 0.40                  | 58.28                     | 6.95                   | 21.35                  | 6.23                    | 2.89                    | n.d.                  |
|              | 2017 | 3.35                  | 44.72                     | 0.50                   | 13.07                  | 17.42                   | 3.22                    | 0.26                  |
|              |      | <b>1.87 ± 2.08 ab</b> | <b>51.50 ± 9.59 bcd</b>   | <b>3.73 ± 4.56 bc</b>  | <b>17.21 ± 5.85 cd</b> | <b>11.83 ± 7.92 ab</b>  | <b>3.05 ± 0.24 ab</b>   | <b>0.13 ± 0.19 ab</b> |
| CB           | 2015 | n.d.                  | 34.06                     | 1.49                   | 16.39                  | 3.97                    | 0.58                    | 0.08                  |
|              | 2016 | n.d.                  | 58.69                     | 9.48                   | 12.71                  | 7.24                    | 6.13                    | n.d.                  |
|              | 2017 | 0.12                  | 45.54                     | 4.25                   | 7.68                   | 30.06                   | 2.93                    | 0.51                  |
|              |      | <b>0.04 ± 0.07 ab</b> | <b>46.10 ± 12.33 abcd</b> | <b>5.08 ± 4.06 c</b>   | <b>12.26 ± 4.38 bc</b> | <b>13.75 ± 14.21 ab</b> | <b>3.22 ± 2.79 ab</b>   | <b>0.20 ± 0.28 ab</b> |
| CL1          | 2015 | 0.21                  | 53.77                     | 0.12                   | 23.28                  | 17.89                   | 1.74                    | n.d.                  |
|              | 2016 | 9.97                  | 57.33                     | 3.19                   | 10.53                  | 11.81                   | 4.12                    | n.d.                  |
|              | 2017 | 2.26                  | 46.97                     | 1.51                   | 9.84                   | 25.49                   | 1.98                    | 0.27                  |
|              |      | <b>4.15 ± 5.15 ab</b> | <b>52.69 ± 5.27 cd</b>    | <b>1.61 ± 1.54 abc</b> | <b>14.55 ± 7.56 cd</b> | <b>18.40 ± 6.86 ab</b>  | <b>2.61 ± 1.31 a</b>    | <b>0.09 ± 0.16 a</b>  |
| CL2          | 2015 | 1.43                  | 60.68                     | 2.83                   | 6.93                   | 7.93                    | 1.02                    | 0.08                  |
|              | 2016 | 0.89                  | 8.80                      | 0.80                   | 1.24                   | 37.66                   | 46.28                   | n.d.                  |
|              | 2017 | 3.44                  | 16.39                     | n.d.                   | 1.67                   | 4.65                    | 63.57                   | n.d.                  |
|              |      | <b>1.92 ± 1.34 ab</b> | <b>28.62 ± 28.02 ab</b>   | <b>1.21 ± 1.46 ab</b>  | <b>3.28 ± 3.17 a</b>   | <b>16.74 ± 18.19 ab</b> | <b>36.96 ± 32.30 d</b>  | <b>0.03 ± 0.04 a</b>  |
| CT           | 2015 | 2.00                  | 58.76                     | 2.10                   | 22.74                  | 11.02                   | 1.01                    | 0.05                  |
|              | 2016 | n.d.                  | 66.93                     | 5.57                   | 15.09                  | 5.00                    | 1.85                    | n.d.                  |
|              | 2017 | 3.13                  | 59.44                     | 2.92                   | 11.05                  | 15.71                   | 1.34                    | 0.35                  |
|              |      | <b>1.71 ± 1.59 ab</b> | <b>61.71 ± 4.53 d</b>     | <b>3.53 ± 1.81 bc</b>  | <b>16.29 ± 5.93 cd</b> | <b>10.58 ± 5.37 ab</b>  | <b>1.40 ± 0.42 a</b>    | <b>0.14 ± 0.19 ab</b> |
| CS           | 2015 | 1.07                  | 47.46                     | 2.29                   | 20.81                  | 0.80                    | 18.96                   | 0.05                  |
|              | 2016 | 11.82                 | 58.50                     | 2.50                   | 20.60                  | 1.36                    | 4.14                    | n.d.                  |
|              | 2017 | 1.61                  | 48.58                     | 2.93                   | 17.31                  | 5.34                    | 11.73                   | 0.29                  |
|              |      | <b>4.83 ± 6.06 ab</b> | <b>51.51 ± 6.08 cd</b>    | <b>2.57 ± 0.33 abc</b> | <b>19.57 ± 1.96 d</b>  | <b>2.50 ± 2.47 a</b>    | <b>11.61 ± 7.41 abc</b> | <b>0.11 ± 0.15 ab</b> |
| SO           | 2016 | n.d.                  | 47.06                     | 4.08                   | 32.62                  | 4.30                    | 5.78                    | 0.90                  |
|              | 2017 | 0.95                  | 38.13                     | 1.97                   | 29.57                  | 19.91                   | 1.41                    | 0.04                  |
|              |      | <b>0.47 ± 0.67 ab</b> | <b>42.59 ± 6.31 abcd</b>  | <b>3.02 ± 1.49 abc</b> | <b>31.09 ± 2.16 e</b>  | <b>12.10 ± 11.04 ab</b> | <b>3.60 ± 3.09 ab</b>   | <b>0.47 ± 0.61 b</b>  |
| Significance |      | ns                    | *                         | ns                     | ***                    | ns                      | *                       | ns                    |
| Varitey      | Year | %KETONES              | %PAH's                    | %LACTONS               | %NORISOPRENOIDS        | %SESQUITERPENES         | %TERPENES               |                       |
| BR           | 2016 | 2.57                  | 0.38                      | n.d.                   | n.d.                   | n.d.                    | 0.96                    |                       |
|              | 2017 | 0.90                  | 0.48                      | n.d.                   | n.d.                   | 0.05                    | 16.03                   |                       |
|              |      | <b>1.73 ± 1.18 a</b>  | <b>0.43 ± 0.07 ab</b>     | <b>n.d. a</b>          | <b>n.d. a</b>          | <b>0.02 ± 0.03 ab</b>   | <b>8.50 ± 10.65 ab</b>  |                       |
| CB           | 2015 | 0.52                  | n.d.                      | n.d.                   | n.d.                   | n.d.                    | 42.91                   |                       |
|              | 2016 | 4.25                  | 0.84                      | n.d.                   | n.d.                   | n.d.                    | 0.66                    |                       |
|              | 2017 | 0.50                  | 0.25                      | n.d.                   | n.d.                   | n.d.                    | 8.16                    |                       |
|              |      | <b>1.75 ± 2.16 a</b>  | <b>0.36 ± 0.43 ab</b>     | <b>n.d. a</b>          | <b>n.d. a</b>          | <b>n.d. ab</b>          | <b>17.24 ± 22.54 ab</b> |                       |
| CL1          | 2015 | 0.05                  | n.d.                      | n.d.                   | 0.19                   | n.d.                    | 2.76                    |                       |
|              | 2016 | 2.16                  | 0.34                      | n.d.                   | n.d.                   | n.d.                    | 0.54                    |                       |
|              | 2017 | 0.74                  | 0.30                      | n.d.                   | n.d.                   | n.d.                    | 10.64                   |                       |
|              |      | <b>0.98 ± 1.08 a</b>  | <b>0.22 ± 0.19 ab</b>     | <b>n.d. a</b>          | <b>0.06 ± 0.11 a</b>   | <b>n.d. a</b>           | <b>4.64 ± 5.31 a</b>    |                       |
| CL2          | 2015 | 0.07                  | n.d.                      | 0.03                   | 0.09                   | n.d.                    | 18.91                   |                       |
|              | 2016 | 0.25                  | 0.02                      | n.d.                   | n.d.                   | n.d.                    | 4.06                    |                       |
|              | 2017 | 0.32                  | n.d.                      | n.d.                   | n.d.                   | 0.04                    | 9.92                    |                       |
|              |      | <b>0.22 ± 0.13 a</b>  | <b>0.01 ± 0.01 a</b>      | <b>0.01 ± 0.02 b</b>   | <b>0.03 ± 0.05 a</b>   | <b>0.01 ± 0.02 a</b>    | <b>10.97 ± 7.48 ab</b>  |                       |
| CT           | 2015 | 0.17                  | n.d.                      | n.d.                   | n.d.                   | n.d.                    | 2.14                    |                       |

|              |      |                      |                       |               |               |               |                       |
|--------------|------|----------------------|-----------------------|---------------|---------------|---------------|-----------------------|
|              | 2016 | 1.69                 | 1.03                  | n.d.          | n.d.          | n.d.          | 2.84                  |
|              | 2017 | 1.25                 | 0.45                  | n.d.          | n.d.          | n.d.          | 4.37                  |
|              |      | <b>1.04 ± 0.78 a</b> | <b>0.49 ± 0.52 ab</b> | <b>n.d. a</b> | <b>n.d. a</b> | <b>n.d. a</b> | <b>3.12 ± 1.14 a</b>  |
| CS           | 2015 | 1.07                 | 0.18                  | n.d.          | n.d.          | n.d.          | 7.32                  |
|              | 2016 | 0.40                 | 0.56                  | n.d.          | n.d.          | n.d.          | 0.13                  |
|              | 2017 | 0.91                 | 0.27                  | n.d.          | n.d.          | n.d.          | 11.02                 |
|              |      | <b>0.79 ± 0.35 a</b> | <b>0.34 ± 0.20 ab</b> | <b>n.d. a</b> | <b>n.d. a</b> | <b>n.d. a</b> | <b>6.16 ± 5.54 ab</b> |
|              | 2016 | 1.45                 | 1.09                  | n.d.          | n.d.          | n.d.          | 2.74                  |
| SO           | 2017 | 0.55                 | 0.24                  | n.d.          | n.d.          | n.d.          | 7.23                  |
|              |      | <b>1.00 ± 0.63 a</b> | <b>0.67 ± 0.60 b</b>  | <b>n.d. a</b> | <b>n.d. a</b> | <b>n.d. a</b> | <b>4.98 ± 3.18 ab</b> |
| Significance |      | ns                   | ns                    | ns            | ns            | *             | ns                    |

PAH's: Polycyclic Aromatic Hydrocarbons; BR: 'Brancellao'; CB: 'Caíño Bravo'; CL1: 'Caíño Longo 1'; CL2: 'Caíño Longo 2'; CT: 'Caíño Tinto'; CS: 'Castañal'; SO: 'Sousón'. n.d.: no detected. \*, \*\*\* and ns indicate significance at  $P \leq 0.05$ ,  $P \leq 0.001$  and not significant difference respectively. Mean value, SD and different roman letters (a-e), showing significant differences according to Fisher's test ( $P < 0.05$ ), are indicated in bold for each variety.
